# Supplementary material
Source: PubMed Central journal article supplement (PMC3540862)

**CHOLESTERYL ESTER ACYL OXIDATION AND REMODELING IN MURINE MACROPHAGES:  
FORMATION OF OXIDIZED PHOSPHATIDYLCHOLINE**

**Patrick M. Hutchins and Robert C. Murphy**

Department of Pharmacology, University of Colorado Denver, Aurora, Colorado, 80045

**SUPPLEMENTAL MATERIAL**

## Experimental Procedures

**Materials-** [1-<sup>14</sup>C]-linoleate was purchased from Perkin Elmer (Waltham, MA). [1-<sup>14</sup>C]-13-HpODE was synthesized by incubating [1-<sup>14</sup>C]-linoleate with soybean 15-lipoxygenase (250 pmols) (Cayman Chemical) in 100  $\mu$ L borate buffer (0.1 M, pH 9) at ambient temperature for ~1 h. Reactions were terminated with 1 volume ice cold MeOH, and the product ([1-<sup>14</sup>C]-13-HpODE) was extracted twice using 500  $\mu$ L 75:25 isooctane:ethyl acetate (v/v).

**Ex-vivo Macrophage Incubations-** Peritoneal macrophages were collected as described in the main body of the text. To the adherent cells of HEPES buffered HBSS (0.5 mL) containing fatty acid-free bovine serum albumin (0.5% w/w) was added. To the medium [1-<sup>14</sup>C]-13-HpODE or [1-<sup>14</sup>C]-linoleate (1.5  $\mu$ M; 0.05  $\mu$ Ci) was added in and adhered cells were incubated for 20 h. After incubation the medium was removed, the cells were washed with 500  $\mu$ L of medium, and adherent cells were then scraped twice with 500  $\mu$ L of 90% MeOH in water containing SnCl<sub>2</sub> (2mM) before lipid were extracted and separated by TLC.

**Chromatography-** The same chiral chromatography used for intact CEs was also employed for the separation of 12-HETE and 15-HETE methyl esters. Free HETEs and HODEs were separated using RP-HPLC-MS/MS (RP-HPLC-MS/MS) as previously reported (29).

TLC separations were carried out on pre-washed and activated Gel G TLC plates (Alltech, Deerfield, IL), which were developed in two steps. The first mobile phase, 50:25:8:4 (v/v/v/v) DCM:MeOH:acetic acid:H<sub>2</sub>O, was allowed to migrate approximately 5 cm from the origin, the plate was then dried briefly before the second mobile phase, 80:20:1 (v/v/v) hexane:ethyl acetate:acetic acid, was allowed to migrate the entire length of the plate. Spots were visualized by spraying with phosphomolybdic acid (20 weight % in EtOH) (Sigma Aldrich, Milwaukee, WI), followed by development on a hot plate. Spots were identified by comparing their R<sub>f</sub> values with those of standards. Radioactive lipids were detected using a System 200 TLC image scanner (Bioscan, Wasgington DC).

**Saponification and Methylation-** CE(HETE) was isolated by NP-HPLC-MS/MS and saponified exactly as previously described (9). Free HETE was methylated by reaction with diazomethane in diethyl ether for 5 min at room temperature. The solution was then dried completely, resuspended in initial HPLC conditions (35:65 (v/v) methyl *tert*-butyl ether:isooctane) for chiral analysis by HPLC-MS/MS

**Mass Spectrometry-** Online RP-LCMS/MS of fatty acids, eicosanoids and other oxylipins was performed using negative ion MRM as previously reported (29), however the current analyses were carried out using the AB Sciex 5500 instrument. Also, additional MRM transitions were included to analyze the numerous HETE and HODE isomers; these mass transitions were based on previously published eicosanoid ESI-MS/MS studies (31). Some experiments included a continuous enhanced product ion scan (EPI scan) of  $m/z$  319.3 to obtain online product ion spectra of unknown HETE analytes.

## Results

**Characterization of CE(12(S)-HETE)-** The most abundant oxCE following macrophage incubation with human LP was a single CE(HETE) isomer, likely CE(12-HETE) or CE(15-HETE), based on its NP-LCMS/MS retention time (Figure 2A). To further characterize this CE(HETE) the peak was isolated by NP-HPLC-MS/MS. An aliquot of this material was re-chromatographed on a chiral column and it eluted as a single enantiomer indicating enzymatic oxygenation (Figure 2A inset *i*). The remainder of the isolated CE(HETE) was saponified and an aliquot of the free acid was subjected to RP-HPLC-MS/MS. The unknown HETE produced a peak corresponding to the MRM transition ( $m/z$  319 to 179) and retention time of authentic 12-HETE, and did not produce any response for the MRM transition for 15-HETE ( $m/z$  319 to 219)(Supplemental Figure 3A,B). When the unknown HETE was subjected to CID the resulting product ion spectra exactly match that of authentic 12-HETE (Supplemental Figure 3C,D). By methylating the remaining hydrolyzed material

and co-injecting the methyl ester onto a chiral column with authentic  $d_8$ -12(*S*)-HETE methyl ester the absolute stereochemistry was confirmed *S* (Supplemental Figure 3E). Analysis of authentic ( $\pm$ )12-HETE methyl ester ensured adequate separation and confirmed that the slight retention time shift between the deuterated material and the unlabeled 12-HETE methyl ester was due to isotopic effects and not structural differences (Supplemental Figure 3F).

***Incorporation of [1- $^{14}$ C]-linoleate and [1- $^{14}$ C]-13-HpODE by Murine Peritoneal***

***Macrophages-*** To investigate reacylation of CE-derived fatty acyl components, specifically linoleate and its oxidation products, 1[ $^{14}$ C]-linoleate and 1[ $^{14}$ C]-13-HpODE was incubated with macrophages for 20 h. Following incubation adherent cells were isolated, scintillation counting revealed the radioactivity in the adherent cells following 1[ $^{14}$ C]-linoleate incubation was approximately five times the amount in cells following 1[ $^{14}$ C]-13-HpODE incubation. Total lipids were extracted from the remainder of the cells and separated by TLC. Radiolabeled cellular lipids, determined by radioactive TLC image scanner, were virtually identical between the two substrates (Supplemental Figure 5). In both cases, essentially all the radioactivity was incorporated into PLs, and showed no incorporation into neutral lipids. The vast majority of the radiolabeled PL migrated with a PC standard.

## Supplemental Figure Legends

**Supplemental Figure 1.** Loss of regio- and stereospecificity among the CE(HODE) isomer distribution of murine peritoneal macrophages over time during incubation with either CE(d<sub>4</sub>-18:2)-containing synthetic lipid vesicles (A) or human lipoproteins (B). The second and fourth peaks in the series, labeled with asterisks, are the all-trans forms, CE(13-EE-HODE) and CE(9-EE-HODE) respectively. Insets show chiral separations after CE(13-HODE) or CE(d<sub>4</sub>-13-HODE) isomers were collected and re-chromatographed.

**Supplemental Figure 2.** Representative NP-HPLC-MS/MS chromatograms of CE(d<sub>4</sub>-HODE) isomers after 20 h incubations of peritoneal macrophages with synthetic lipid vesicles containing CE(d<sub>4</sub>-18:2) and various anti-oxidants at 3 mole percent (A). Insets show chiral analysis of isolated CE(d<sub>4</sub>-13-(ZE)-HODE). (B) The bars indicate average peak area ratios of CE(d<sub>4</sub>-13-(ZE)-HODE)/CE(d<sub>4</sub>-9-(EZ)-HODE) (filled bars) or CE(13(S)-(ZE)-HODE)/CE(13(R)-(ZE)-HODE) (open bars), error bars indicate mean±SEM (*n*=3). The dashed line indicates a ratio of one, i.e. complete loss of regio- or stereospecificity.

**Supplemental Figure 3.** Characterization of the unknown CE(HETE) isomer. RP-LCMS/MS analysis and product ion spectra of authentic 12-HETE and 15-HETE (A,B) or hydrolysis products of the unknown CE(HETE) (C,D). (C) Chiral separation of methylated CE(HETE) hydrolysis products co-injected with authentic d<sub>8</sub>-12(S)-HETE methyl ester. (D) Chiral separation of authentic (±)12-HETE methyl ester co-injected with authentic d<sub>8</sub>-12(S)-HETE methyl ester.

**Supplemental Figure 4.** Representative RP-HPLC-MS/MS MRM chromatograms of free d<sub>4</sub>-13-HODE and 13-HODE (A) or d<sub>4</sub>-9-HODE and 9-HODE (B) following 20 h incubations of peritoneal macrophages with synthetic lipid vesicles containing CE(d<sub>4</sub>-18:2) (*n*=3). Lipids were extracted

from cells and incubation medium before analysis. Certain aliquots were co-injected with authentic 9-hydroxy-9,10,12,13-d<sub>4</sub>-HODE and 13-hydroxy-9,10,12,13-d<sub>4</sub>-HODE which could be independently detected for the non-deuterated HODEs and the 17,17,18,18-d<sub>4</sub>-HODE isomers derived from CE(d<sub>4</sub>-18:2). These experiments confirmed the identifications of the peaks, especially important in the 9-HODE analyses where a later eluting compound formed spurious peak (at 15.5 min) in the chromatogram.

**Supplemental Figure 5.** Thin layer chromatography of cellular lipids extracted from peritoneal macrophages following 20 h incubation with [1-<sup>14</sup>C]-18:2 or [1-<sup>14</sup>C]-13-HpODE as detected by radioactive TLC image scanner. The dashed lines show the migration of radioactive components. The height of the line indicates the relative intensity of radioactivity at that distance from the origin, the traces were independently scaled. Arrows above the image indicate the migration of authentic lipid standards. PC: phosphocholine, PS: phosphoserine, PE: phosphoethanolamine, CL: cardiolipin, Chol: cholesterol, HpODE: 13-HpODE, 18:2: linoleate, TAG: triacylglyceride, CE: Cholesterol ester.

**Supplemental Table 1.** Phospholipid multiple reaction monitoring mass transitions.

| Acyl Components <sup>a</sup> |             | Q1 <i>m/z</i> <sup>b</sup>              |                                       |                                       |                                       |                                       | Q3 <i>m/z</i> <sup>d</sup> |                         |
|------------------------------|-------------|-----------------------------------------|---------------------------------------|---------------------------------------|---------------------------------------|---------------------------------------|----------------------------|-------------------------|
|                              |             | PC <sup>c</sup><br>[M+OAc] <sup>-</sup> | PE <sup>c</sup><br>[M-H] <sup>-</sup> | PG <sup>c</sup><br>[M-H] <sup>-</sup> | PI <sup>c</sup><br>[M-H] <sup>-</sup> | PS <sup>c</sup><br>[M-H] <sup>-</sup> | -<br>[M-H] <sup>-</sup>    | -<br>[M-H] <sup>-</sup> |
| 16:0                         | 16:0        | 793                                     | 691                                   | 722                                   | 810                                   | 735                                   | 255                        | -                       |
| 16:0                         | 18:0/d418:2 | 821                                     | 719                                   | 750                                   | 838                                   | 763                                   | 255                        | 283                     |
| 16:0                         | 18:1        | 819                                     | 717                                   | 748                                   | 836                                   | 761                                   | 255                        | 281                     |
| 16:0                         | 18:2        | 817                                     | 715                                   | 746                                   | 834                                   | 759                                   | 255                        | 279                     |
| 16:0                         | 20:4        | 841                                     | 739                                   | 770                                   | 858                                   | 783                                   | 255                        | 303                     |
| 18:0/d418:2                  | 18:0/d418:2 | 849                                     | 747                                   | 778                                   | 866                                   | 791                                   | 283                        | -                       |
| 18:0/d418:2                  | 18:1        | 847                                     | 745                                   | 776                                   | 864                                   | 789                                   | 283                        | 281                     |
| 18:0/d418:2                  | 18:2        | 845                                     | 743                                   | 774                                   | 862                                   | 787                                   | 283                        | 279                     |
| 18:0/d418:2                  | 20:4        | 869                                     | 767                                   | 798                                   | 886                                   | 811                                   | 283                        | 303                     |
| 18:1                         | 18:1        | 845                                     | 743                                   | 774                                   | 862                                   | 787                                   | 281                        | -                       |
| 18:1                         | 18:2        | 843                                     | 741                                   | 772                                   | 860                                   | 785                                   | 281                        | 279                     |
| 18:1                         | 20:4        | 867                                     | 765                                   | 796                                   | 884                                   | 809                                   | 303                        | 303                     |
| 18:2                         | 18:2        | 841                                     | 739                                   | 770                                   | 858                                   | 783                                   | 279                        | -                       |
| 18:2                         | 20:4        | 865                                     | 763                                   | 794                                   | 882                                   | 807                                   | 279                        | 303                     |
| 20:4                         | 20:4        | 889                                     | 787                                   | 818                                   | 906                                   | 831                                   | 303                        | -                       |
| 16:0                         | HODE        | 833                                     | 731                                   | 762                                   | 850                                   | 775                                   | 255                        | 295                     |
| 18:0/d418:2                  | HODE        | 861                                     | 759                                   | 790                                   | 878                                   | 803                                   | 283                        | 295                     |
| 18:1                         | HODE        | 859                                     | 757                                   | 788                                   | 876                                   | 801                                   | 281                        | 295                     |
| 18:2                         | HODE        | 857                                     | 755                                   | 786                                   | 874                                   | 799                                   | 279                        | 295                     |
| 20:4                         | HODE        | 881                                     | 779                                   | 810                                   | 898                                   | 823                                   | 303                        | 295                     |
| 16:0                         | oxoODE      | 831                                     | 729                                   | 760                                   | 848                                   | 773                                   | 255                        | 293                     |
| 18:0/d418:2                  | oxoODE      | 859                                     | 757                                   | 788                                   | 876                                   | 801                                   | 283                        | 293                     |
| 18:1                         | oxoODE      | 857                                     | 755                                   | 786                                   | 874                                   | 799                                   | 281                        | 293                     |
| 18:2                         | oxoODE      | 855                                     | 753                                   | 784                                   | 872                                   | 797                                   | 279                        | 293                     |
| 20:4                         | oxoODE      | 879                                     | 777                                   | 808                                   | 896                                   | 821                                   | 303                        | 293                     |
| 16:0                         | di-oxy-LA   | 849                                     | 747                                   | 778                                   | 866                                   | 791                                   | 255                        | 311                     |
| 18:0/d418:2                  | di-oxy-LA   | 877                                     | 775                                   | 806                                   | 894                                   | 819                                   | 283                        | 311                     |
| 18:1                         | di-oxy-LA   | 875                                     | 773                                   | 804                                   | 892                                   | 817                                   | 281                        | 311                     |
| 18:2                         | di-oxy-LA   | 873                                     | 771                                   | 802                                   | 890                                   | 815                                   | 279                        | 311                     |
| 20:4                         | di-oxy-LA   | 897                                     | 795                                   | 826                                   | 914                                   | 839                                   | 303                        | 311                     |
| 16:0                         | d4HODE      | 837                                     | 735                                   | 766                                   | 854                                   | 779                                   | 255                        | 299                     |
| 18:0/d418:2                  | d4HODE      | 865                                     | 763                                   | 794                                   | 882                                   | 807                                   | 283                        | 299                     |
| 18:1                         | d4HODE      | 863                                     | 761                                   | 792                                   | 880                                   | 805                                   | 281                        | 299                     |
| 18:2                         | d4HODE      | 861                                     | 759                                   | 790                                   | 878                                   | 803                                   | 279                        | 299                     |
| 20:4                         | d4HODE      | 885                                     | 783                                   | 814                                   | 902                                   | 827                                   | 303                        | 299                     |
| 16:0                         | d4oxoODE    | 835                                     | 733                                   | 764                                   | 852                                   | 777                                   | 255                        | 297                     |
| 18:0/d418:2                  | d4oxoODE    | 863                                     | 761                                   | 792                                   | 880                                   | 805                                   | 283                        | 297                     |
| 18:1                         | d4oxoODE    | 861                                     | 759                                   | 790                                   | 878                                   | 803                                   | 281                        | 297                     |
| 18:2                         | d4oxoODE    | 859                                     | 757                                   | 788                                   | 876                                   | 801                                   | 279                        | 297                     |
| 20:4                         | d4oxoODE    | 883                                     | 781                                   | 812                                   | 900                                   | 825                                   | 303                        | 297                     |
| 16:0                         | d4di-oxy-LA | 853                                     | 751                                   | 782                                   | 870                                   | 795                                   | 255                        | 315                     |
| 18:0/d418:2                  | d4di-oxy-LA | 881                                     | 779                                   | 810                                   | 898                                   | 823                                   | 283                        | 315                     |
| 18:1                         | d4di-oxy-LA | 879                                     | 777                                   | 808                                   | 896                                   | 821                                   | 281                        | 315                     |
| 18:2                         | d4di-oxy-LA | 877                                     | 775                                   | 806                                   | 894                                   | 819                                   | 279                        | 315                     |
| 20:4                         | d4di-oxy-LA | 901                                     | 799                                   | 830                                   | 918                                   | 843                                   | 303                        | 315                     |

<sup>a</sup> Abbreviated names of esterified fatty acids; total acyl chain carbons:number of double bonds, "d4" denotes acyl chain containing 4 deuterium atoms, LA: linoleic acid

<sup>b</sup> Nominal *m/z* of parent ions; ion species are indicated in brackets

<sup>c</sup> PC: phosphocholine, PE: phosphoethanolamine, PG: phosphoglycerol, PI: phosphoinositol, PS: phosphoserine

<sup>d</sup> Nominal *m/z* of predicted acyl carboxylate product ions; dashed indicate degenerate transitions

## Supplemental Figure 1

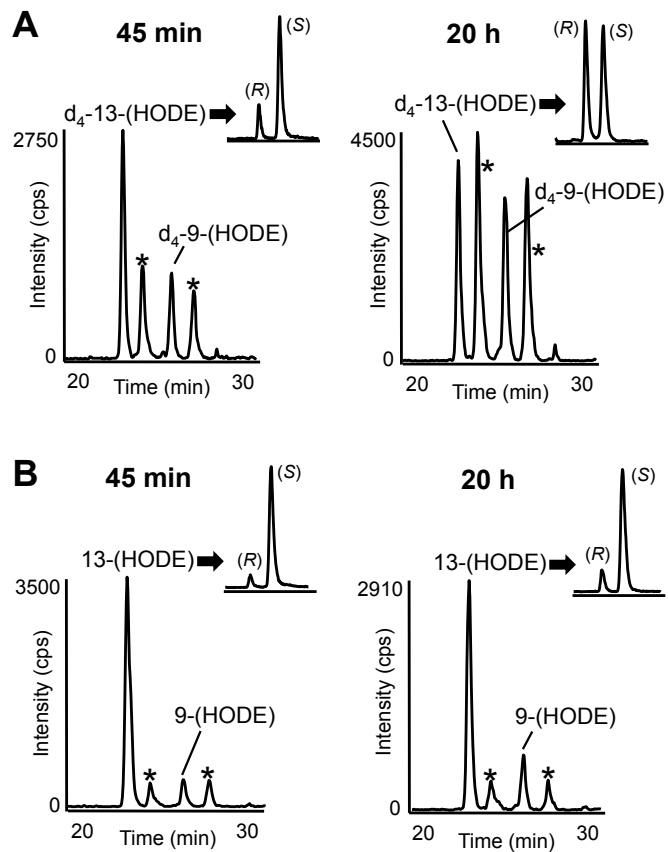



## Supplemental Figure 2

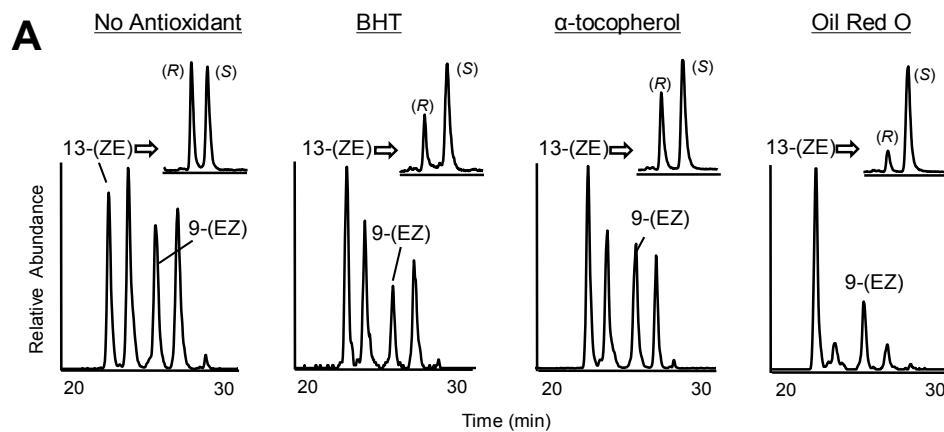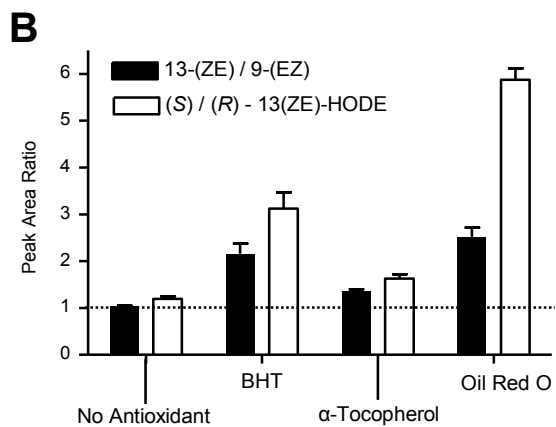

### Supplemental Figure 3

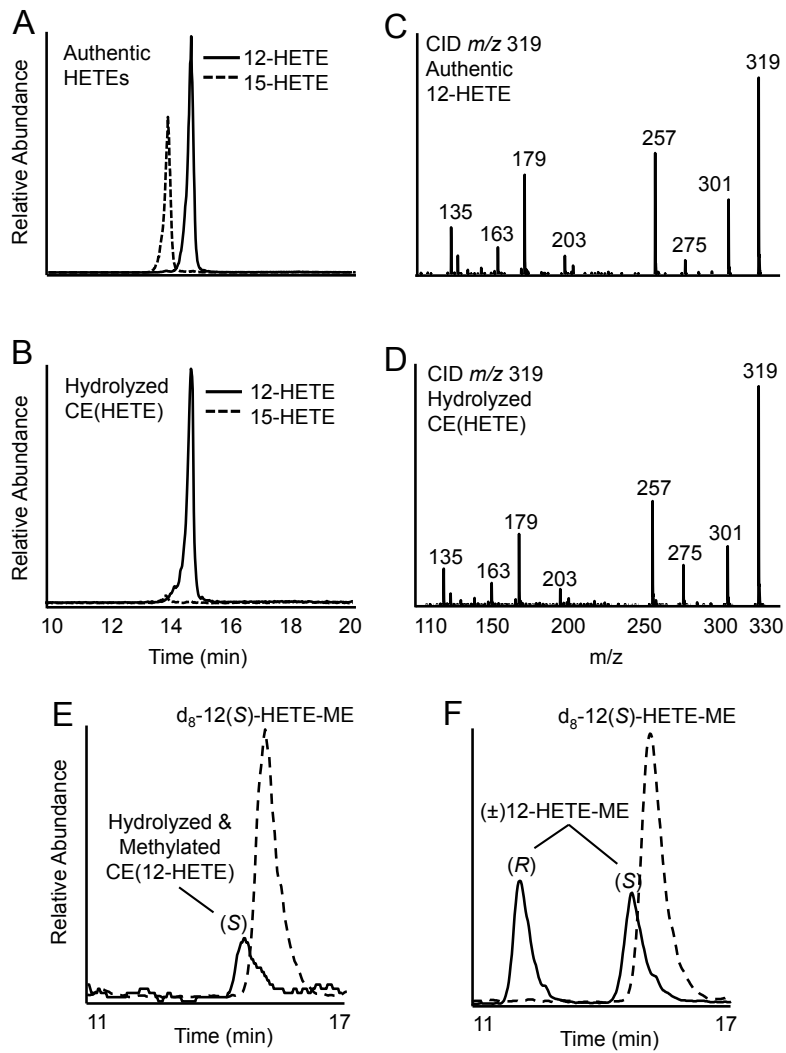

### Supplemental Figure 4

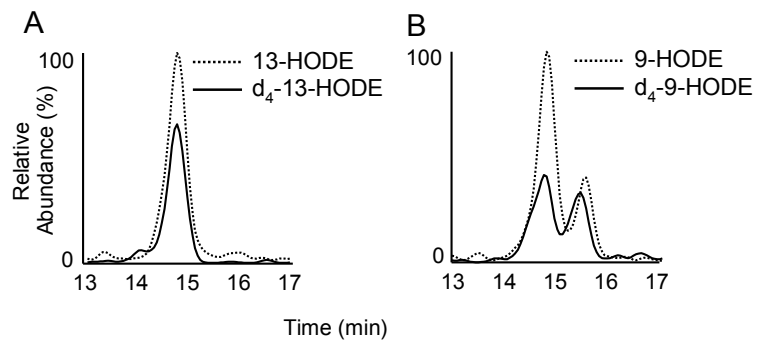

Supplemental Figure 5

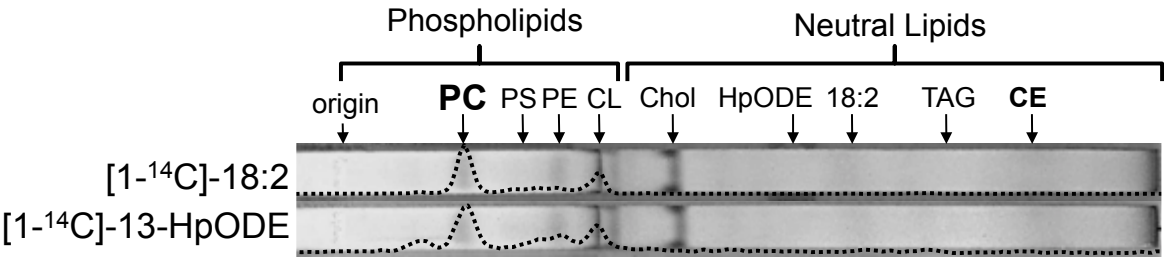

Supplement: supp_M026799_jlr.M026799-1.pdf [file supp_M026799_jlr.M026799-1.pdf]
